# Supplementary material for: Fabrication of a novel separation-free heterostructured photocatalyst with enhanced visible light activity in photocatalytic degradation of antibiotics
Source: Royal Society of Chemistry journal article supplement (doi:10.1039/d1ta09757a), 2021-12-20
Supplement: d1ta09757a1.pdf [file d1ta09757a1.pdf]

## *Supplementary Material*

# **Fabrication of a novel separation-free heterostructured photocatalyst with enhanced visible light activity in photocatalytic degradation of antibiotics**

Xingkui Guo<sup>a</sup>, Fan Yang<sup>a,\*</sup>, Xiaolu Sun<sup>a</sup>, Chuang Han<sup>a</sup>, Yujiao Bai<sup>a</sup>, Guanjun Liu<sup>a</sup>,  
Wenbo Liu<sup>a</sup>, Rongguo Wang<sup>a,b,\*</sup>

<sup>a</sup> National Key Laboratory of Science and Technology on Advanced Composites in Special Environments

Harbin Institute of Technology

Harbin 150080, P. R. China

<sup>b</sup> Shenzhen STRONG Advanced Materials Research Institute Co., Ltd

Shenzhen, P. R. China

E-mail: [wrg@hit.edu.cn](mailto:wrg@hit.edu.cn); [yngfan@163.com](mailto:yngfan@163.com)

## Supplementary material:

### Figure captions

Fig. S1. SEM image (a), EDS (c), TEM image (c) and HRTEM image (d) of PDMAA-TiO<sub>2</sub> hydrogel; SEM image (e), EDS (f), TEM image (g) and HRTEM image (h) of PDMAA-CuS hydrogel.

Fig. S2. a) UV-vis diffuse reflectance spectra of TiO<sub>2</sub> particles, CuS particles, PDMAA-TiO<sub>2</sub>, PDMAA-CuS and PDMAA-TiO<sub>2</sub>/CuS hydrogel. b) The band gap evaluation for linear dependence of  $(Ah\nu)^2$  versus  $h\nu$  for TiO<sub>2</sub> and CuS.

Fig. S3. a) Photoluminescence spectra of PDMAA-TiO<sub>2</sub>, PDMAA-CuS and PDMAA-TiO<sub>2</sub>/CuS hydrogel. b) The transient photocurrent response of PDMAA-TiO<sub>2</sub>, PDMAA-CuS and PDMAA-TiO<sub>2</sub>/CuS photocatalyst electrodes with light on-off cycles under visible light irradiation.

Fig. S4. TGA curves of PDMAA, PDMAA-TiO<sub>2</sub>, PDMAA-CuS, and PDMAA-TiO<sub>2</sub>/CuS hydrogels.

Fig. S5. The swelling ratio of PDMAA-TiO<sub>2</sub>, PDMAA-CuS and PDMAA-TiO<sub>2</sub>/CuS hydrogel.

Fig. S6. Zeta potentials of PDMAA, PDMAA-TiO<sub>2</sub>, PDMAA-CuS and PDMAA-TiO<sub>2</sub>/CuS hydrogel.

Fig. S7. FTIR spectra (a) PDMAA, (b) PDMAA-TiO<sub>2</sub> and (c) PDMAA-TiO<sub>2</sub>/CuS hydrogel.

Fig. S8. XRD spectra of TiO<sub>2</sub> nanoparticle, and PDMAA, PDMAA-TiO<sub>2</sub>, PDMAA-

CuS and PDMAA-TiO<sub>2</sub>/CuS hydrogel.

Fig. S9. a) Adsorption isotherm analyses of sulfaclozine on PDMAA-TiO<sub>2</sub>/CuS hydrogel. Conditions: hydrogel 0.1g, pH<sub>0</sub>= 7.0, 25 °C. b) Adsorption isotherm analyses with Langmuir model of sulfaclozine on PDMAA-TiO<sub>2</sub>/CuS hydrogel. Conditions: hydrogel 0.1g, pH<sub>0</sub>= 7.0, 25 °C.

Fig. S10. High-resolution XPS spectra (a) N 1s, (b) O 1s, (c) S 2p, (d) Ti 2p of PDMAA-TiO<sub>2</sub> hydrogel before and after the adsorption of sulfaclozine.

Fig. S11. High-resolution XPS spectra (a) N 1s, (b) O 1s, (c) S 2p, (d) Cu 2p of PDMAA-CuS hydrogel before and after the adsorption of sulfaclozine.

Fig. S12. High-resolution XPS spectra of (a) Ti 2p and (b) O 1s for PDMAA-TiO<sub>2</sub>, (c) S 2p and (d) Cu 2p for PDMAA-CuS, and (e) Ti 2p, (f) O 1s, (g) S 2p, and (h) Cu 2p for PDMAA-TiO<sub>2</sub>/CuS composite.

Fig. S13. The photodegradation rate of sulfaclozine using PDMAA-TiO<sub>2</sub>, PDMAA-CuS, PDMAA-TiO<sub>2</sub>/CuS hydrogel, and mix (PDMAA-CuS hydrogel and TiO<sub>2</sub> nanoparticles) with 300W visible light.

Fig. 14. The MS data and proposed structures of the intermediates of sulfaclozine photodegradation in the composite hydrogel catalysis system.

Fig. S15. The TOC removal ratio of sulfaclozine in the composite hydrogel catalysis system.

Fig. S16. The curves of the removal rate for sulfaclozine using PDMAA-TiO<sub>2</sub>/CuS hydrogels at various circumstances including adsorption before degradation, adsorption

again after degradation, and repeating adsorption without degradation.

Fig. S17. XRD spectra of PDMAA-TiO<sub>2</sub>/CuS hydrogel before and after the cycling test.

Fig. S18. XPS spectra of PDMAA-TiO<sub>2</sub>/CuS hydrogel before and after the cycling test.

Fig. S19. The SEM images of PDMAA-TiO<sub>2</sub>/CuS hydrogel (a) before and (b) after the cycling test.

Fig. S20. The TEM images of PDMAA-TiO<sub>2</sub>/CuS hydrogel (a,b,c) before and (d, e, f) after the cycling test.

Table S1. The photodegradation intermediates of sulfaclozine.

Table S2. Property comparison of photocatalysts reported in recent three years for degradation of antibiotics under visible light irradiation.

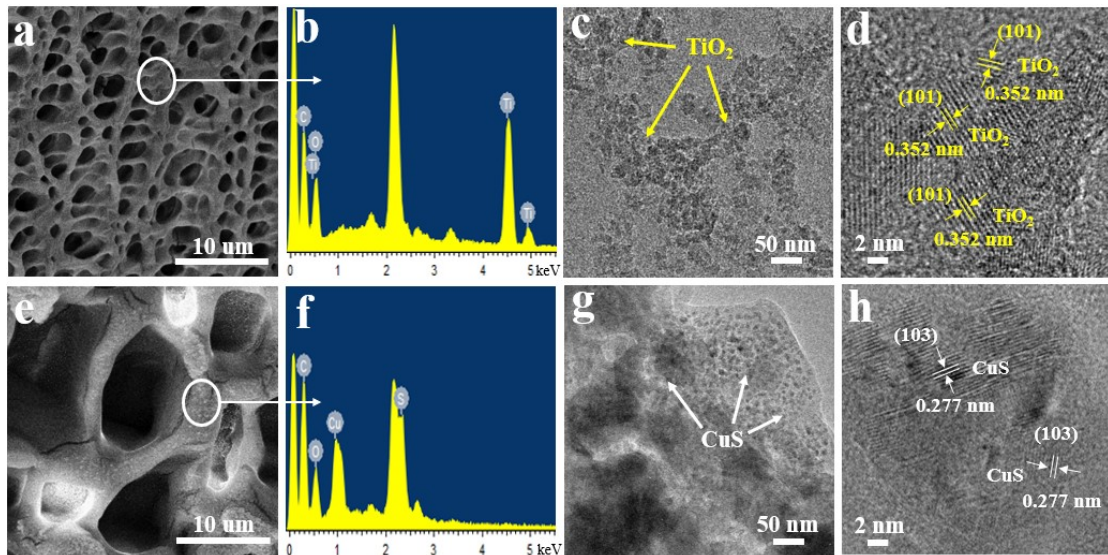

Fig. S1. SEM image (a), EDS (c), TEM image (c) and HRTEM image (d) of PDMAA-TiO<sub>2</sub> hydrogel; SEM image (e), EDS (f), TEM image (g) and HRTEM image (h) of PDMAA-CuS hydrogel.

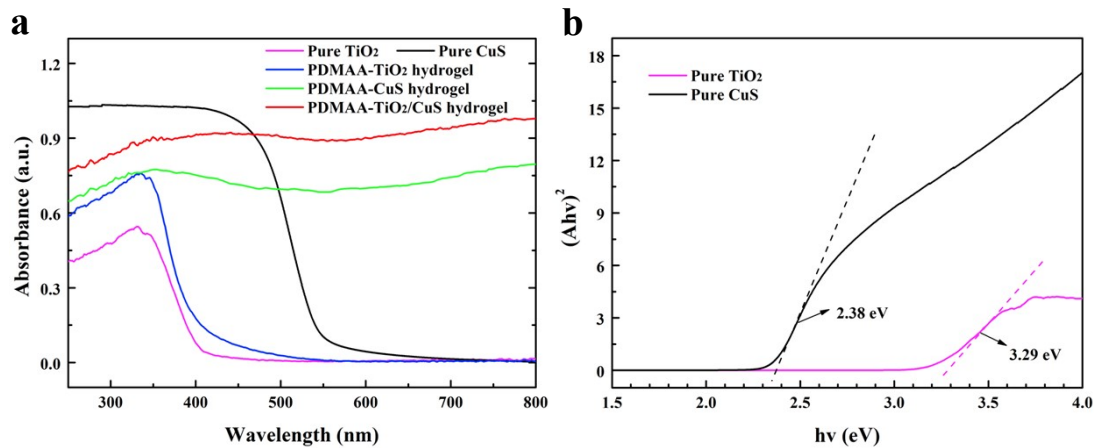

Fig. S2. a) UV-vis diffuse reflectance spectra of TiO<sub>2</sub> particles, CuS particles, PDMAA-TiO<sub>2</sub>, PDMAA-CuS and PDMAA-TiO<sub>2</sub>/CuS hydrogel. b) The band gap evaluation for linear dependence of (Ahv)<sup>2</sup> versus hv for TiO<sub>2</sub> and CuS.

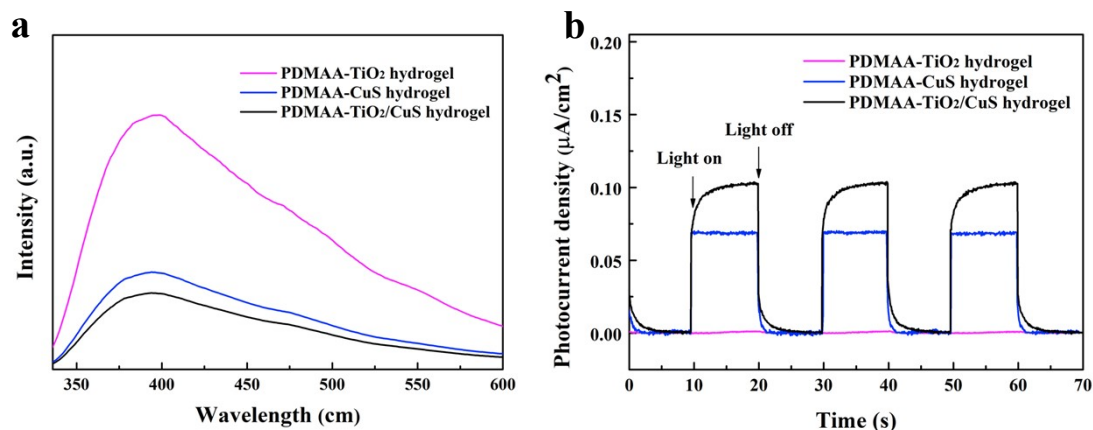

Fig. S3. a) Photoluminescence spectra of PDMAA-TiO<sub>2</sub>, PDMAA-CuS and PDMAA-TiO<sub>2</sub>/CuS hydrogel. b) The transient photocurrent response of PDMAA-TiO<sub>2</sub>, PDMAA-CuS and PDMAA-TiO<sub>2</sub>/CuS photocatalyst electrodes with light on-off cycles under visible light irradiation.

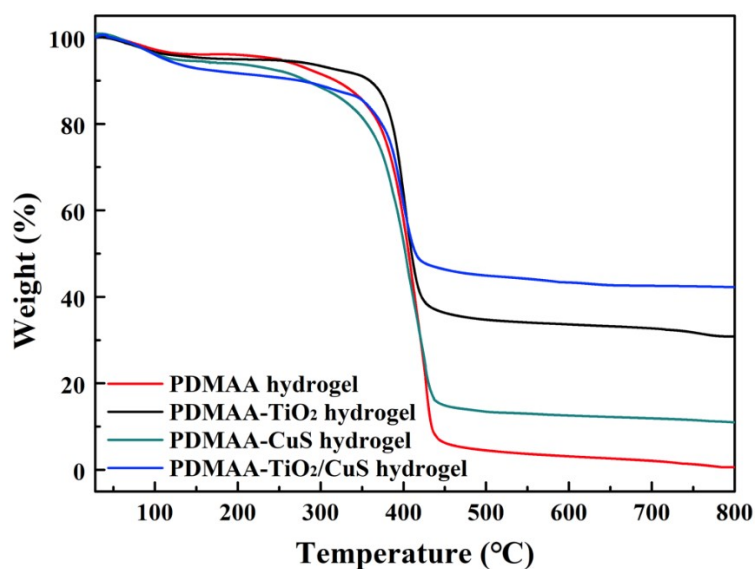

Fig. S4. TGA curves of PDMAA, PDMAA-TiO<sub>2</sub>, PDMAA-CuS, and PDMAA-TiO<sub>2</sub>/CuS hydrogels.

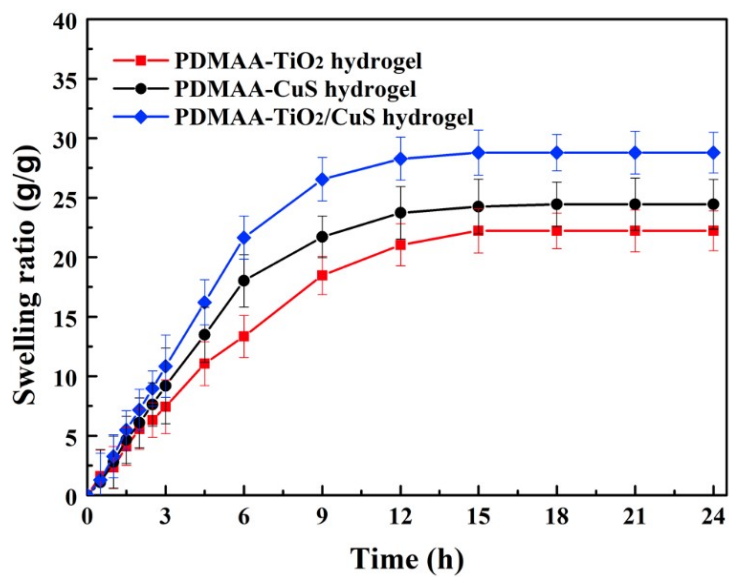

Fig. S5. The swelling ratio of PDMAA-TiO<sub>2</sub>, PDMAA-CuS and PDMAA-TiO<sub>2</sub>/CuS hydrogel.

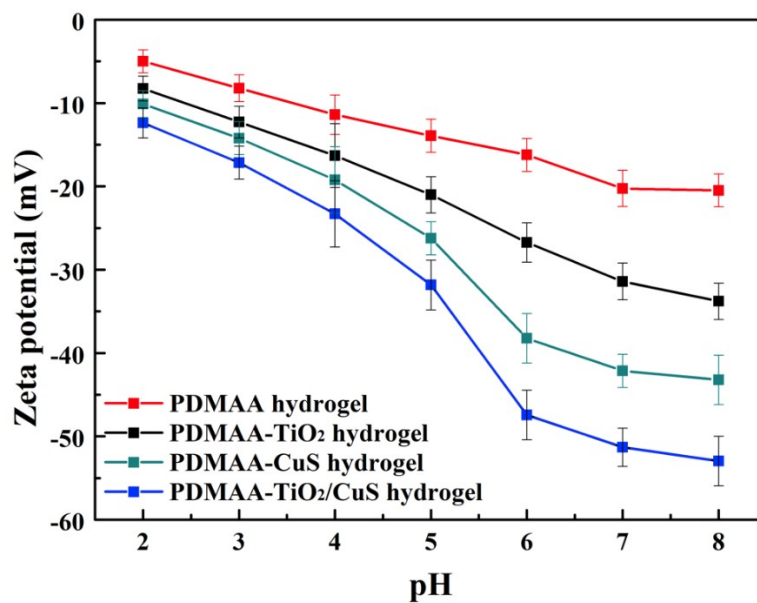

Fig. S6. Zeta potentials of PDMAA, PDMAA-TiO<sub>2</sub>, PDMAA-CuS and PDMAA-TiO<sub>2</sub>/CuS hydrogel.

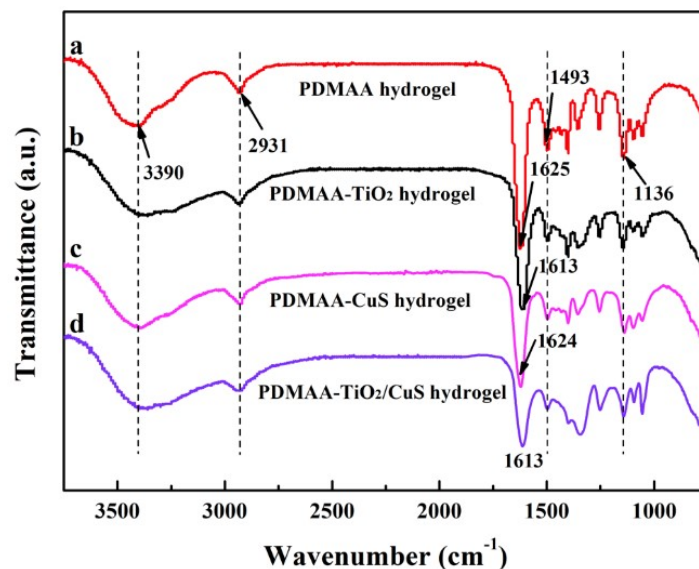

Fig. S7. FTIR spectra (a) PDMAA, (b) PDMAA-TiO<sub>2</sub>, (c) PDMAA-CuS, and (d) PDMAA-TiO<sub>2</sub>/CuS hydrogel.

The FT-IR spectrum of PDMAA, PDMAA-TiO<sub>2</sub>, PDMAA-CuS, and PDMAA-TiO<sub>2</sub>/CuS were displayed in Fig. S7. A broad peak around 3390 cm<sup>-1</sup> was attributed to O-H stretching vibration. The peak at 2931 cm<sup>-1</sup> was the result of the C-H stretching vibration. The absorption peaks at 1493 cm<sup>-1</sup> and 1136 cm<sup>-1</sup> were assigned to C-N stretching and bending vibrations, respectively. The stretch vibration peak of the carbonyl groups of PDMAA shifted from 1625 cm<sup>-1</sup> to lower wavenumber field at 1613 cm<sup>-1</sup> in the FTIR spectra, which was the evidence of hydrogen bonding interaction between the polymer chains and TiO<sub>2</sub> nanoparticles during curing process [1]. After loaded CuS, the FTIR spectra peak at 1613 cm<sup>-1</sup> weakened dramatically compared with PDMAA-TiO<sub>2</sub>, which could be explained by the fact that carbonyl groups were the major function groups that interacted with CuS [2].



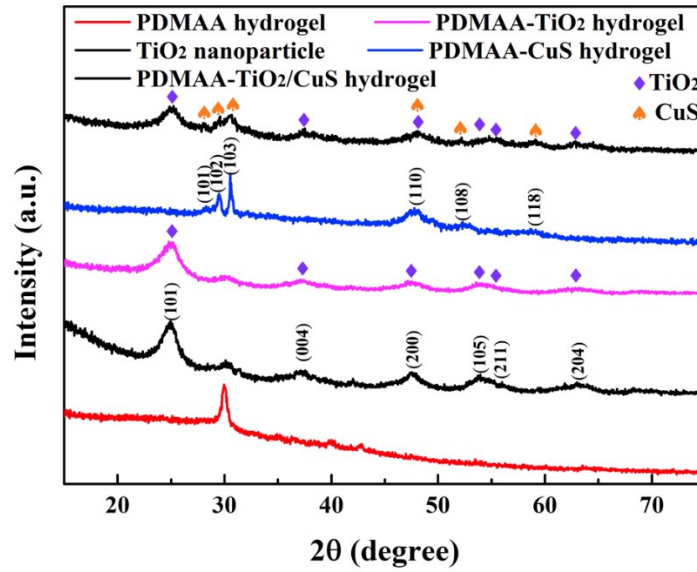

Fig. S8. XRD spectra of  $\text{TiO}_2$  nanoparticle, and PDMAA, PDMAA- $\text{TiO}_2$ , PDMAA-CuS and PDMAA- $\text{TiO}_2/\text{CuS}$  hydrogel.

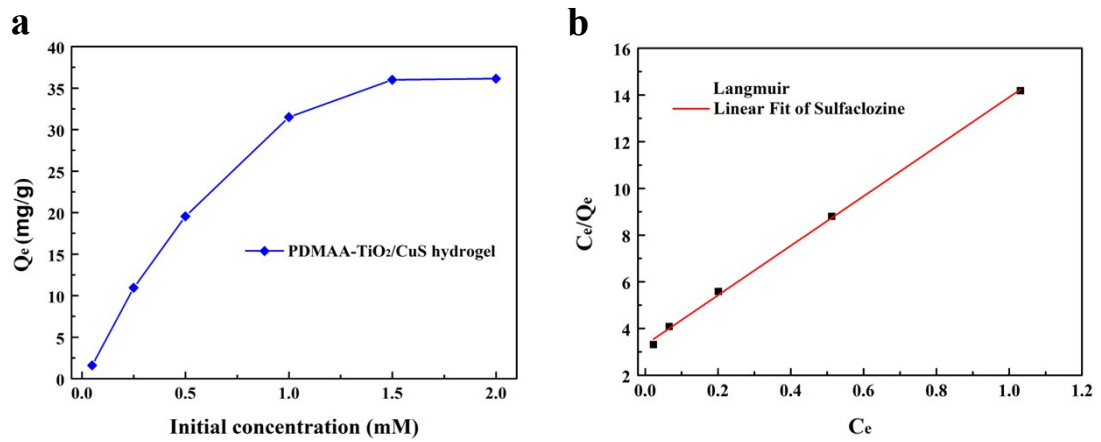

Fig. S9. a) Adsorption isotherm analyses of sulfaclozine on PDMAA- $\text{TiO}_2/\text{CuS}$  hydrogel. b) Adsorption isotherm analyses with Langmuir model of sulfaclozine on PDMAA- $\text{TiO}_2/\text{CuS}$  hydrogel.

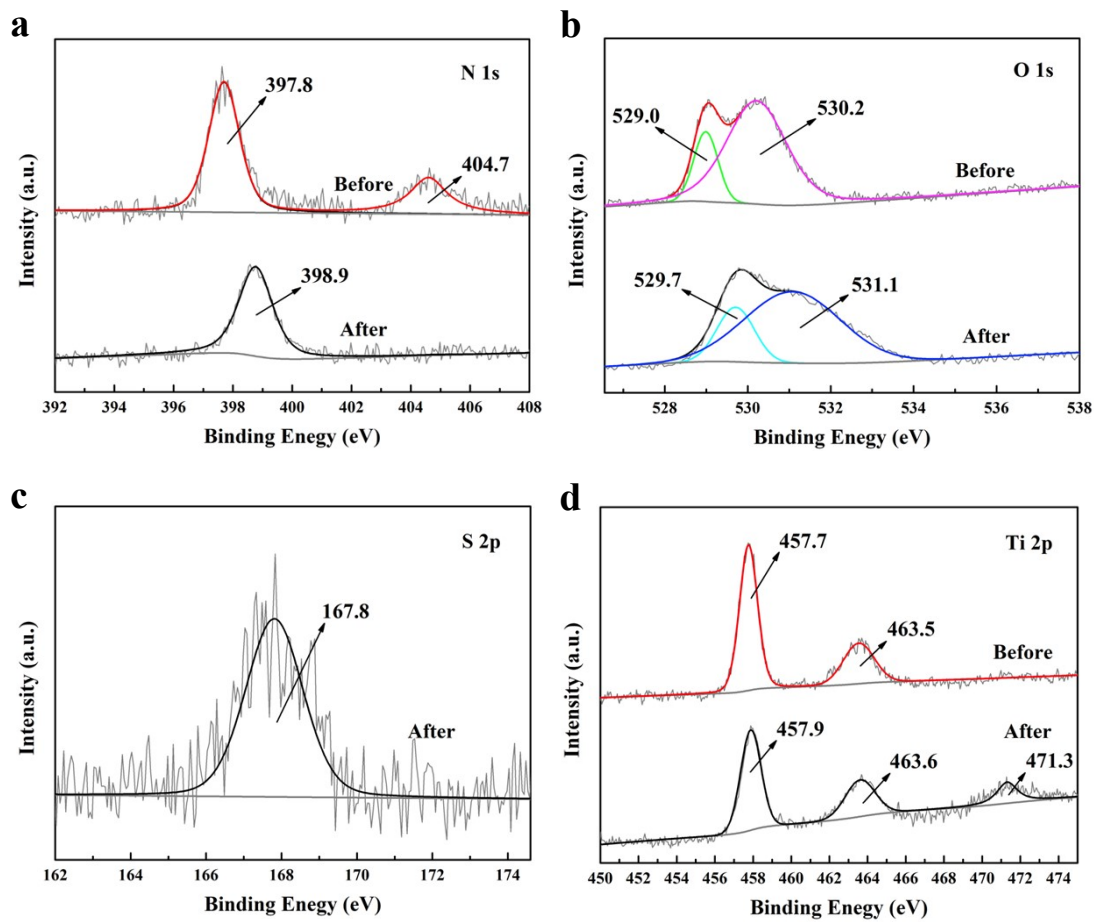

Fig. S10. High-resolution XPS spectra (a) N 1s, (b) O 1s, (c) S 2p, (d) Ti 2p of PDMAA-TiO<sub>2</sub> hydrogel before and after the adsorption of sulfaclozine.

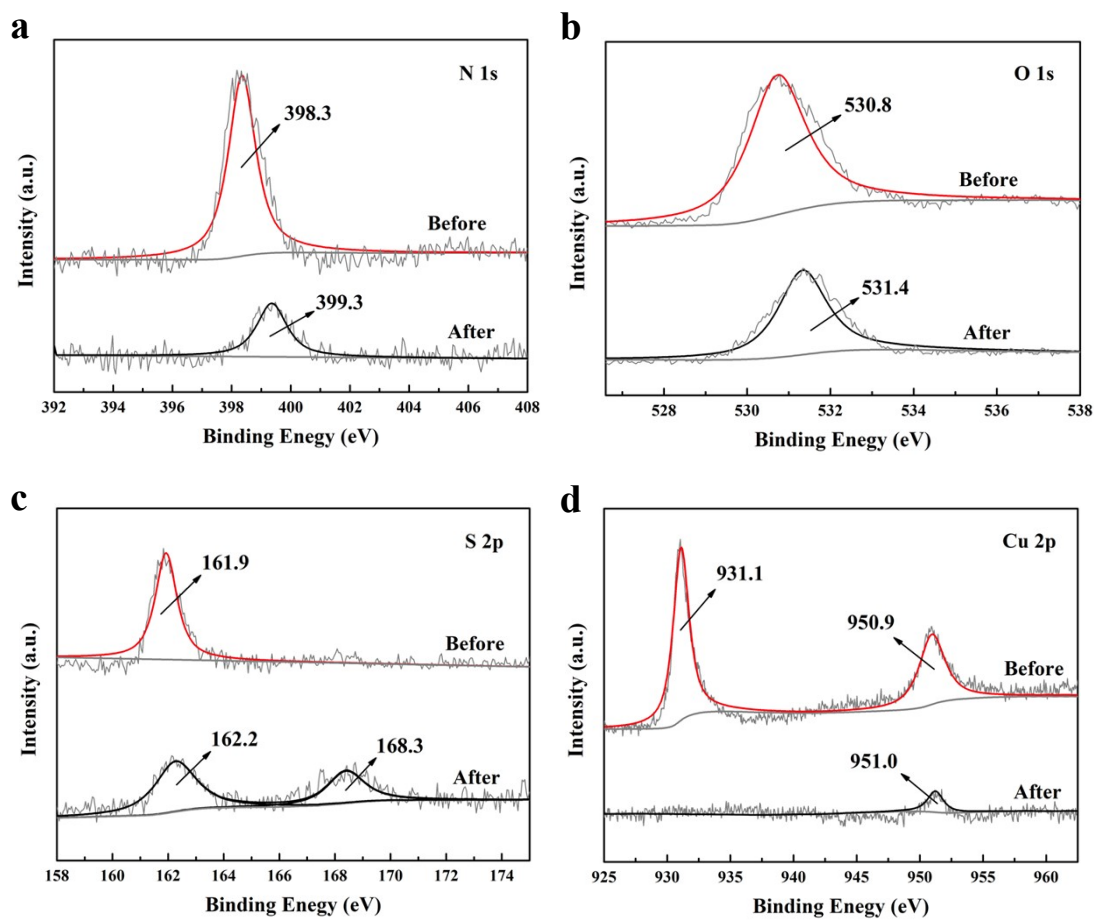

Fig. S11. High-resolution XPS spectra (a) N 1s, (b) O 1s, (c) S 2p, (d) Cu 2p of PDMAA-CuS hydrogel before and after the adsorption of sulfaclozine.

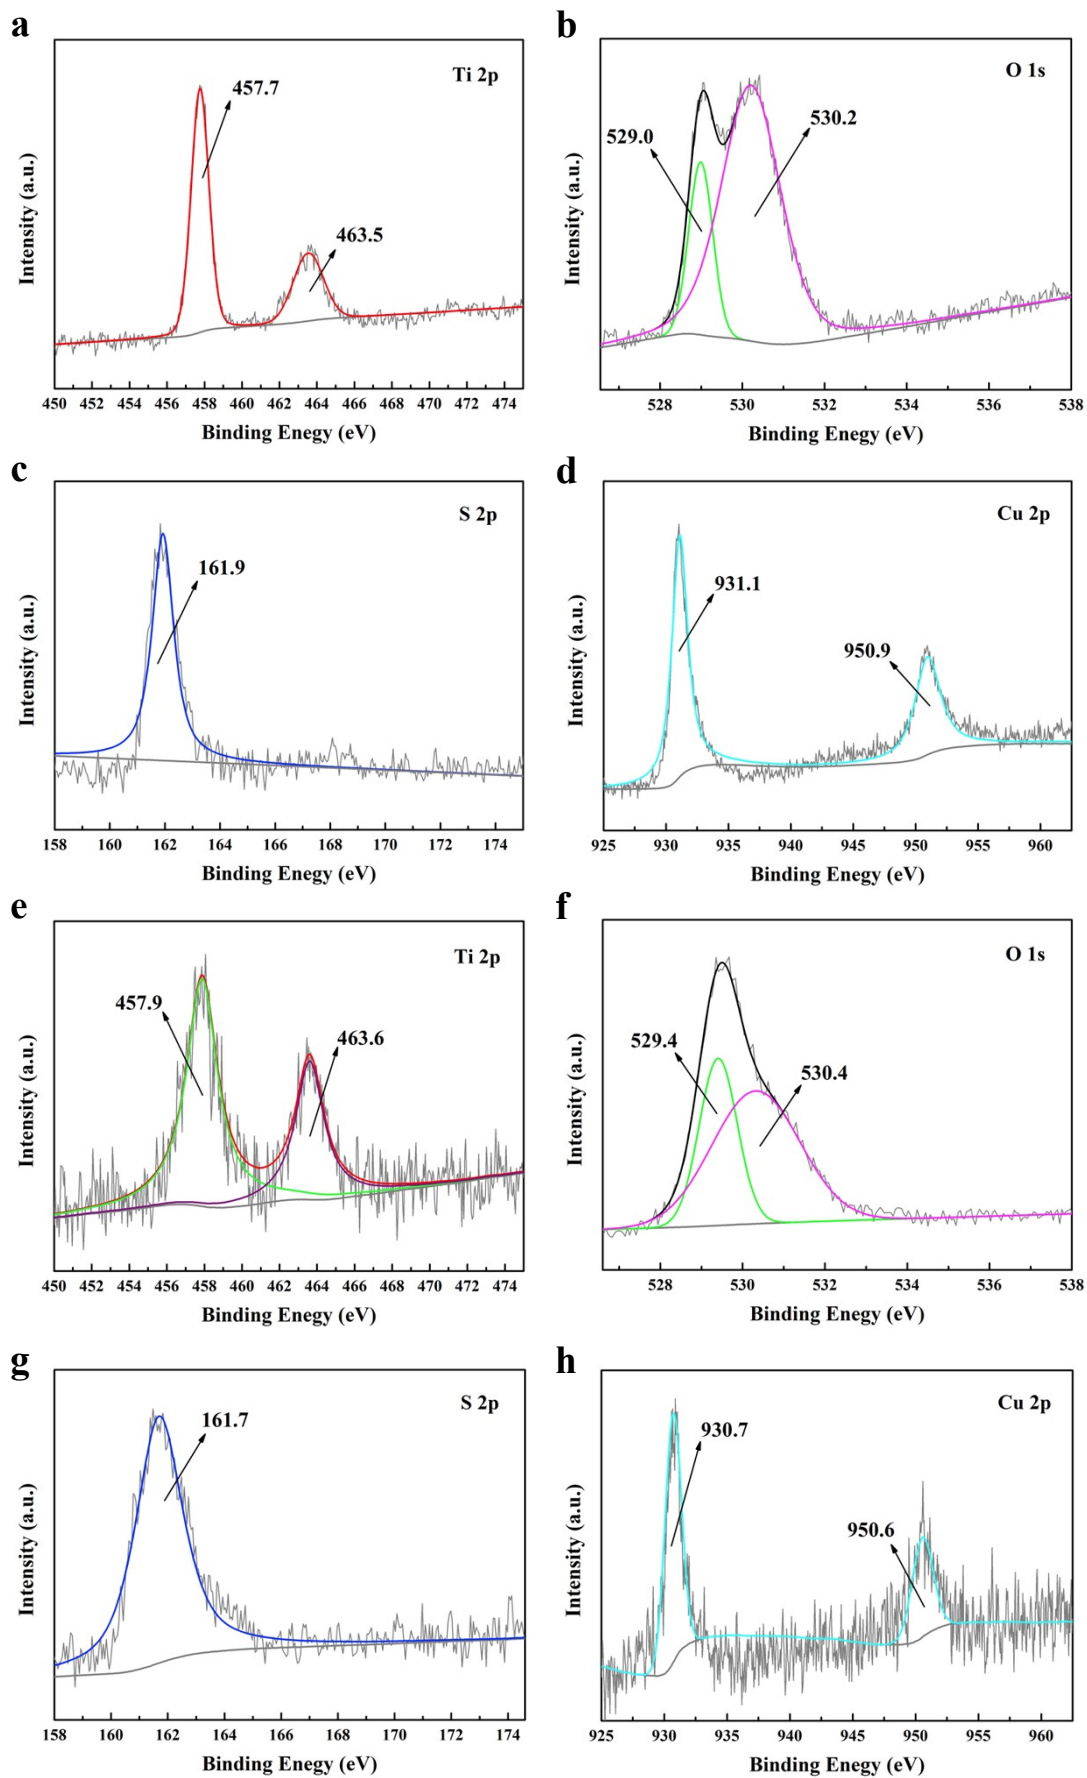

Fig. S12. High-resolution XPS spectra of (a) Ti 2p and (b) O 1s for PDMAA-TiO<sub>2</sub>, (c)

S 2p and (d) Cu 2p for PDMAA-CuS, and (e) Ti 2p, (f) O 1s, (g) S 2p, and (h) Cu 2p for PDMAA-TiO<sub>2</sub>/CuS composite.

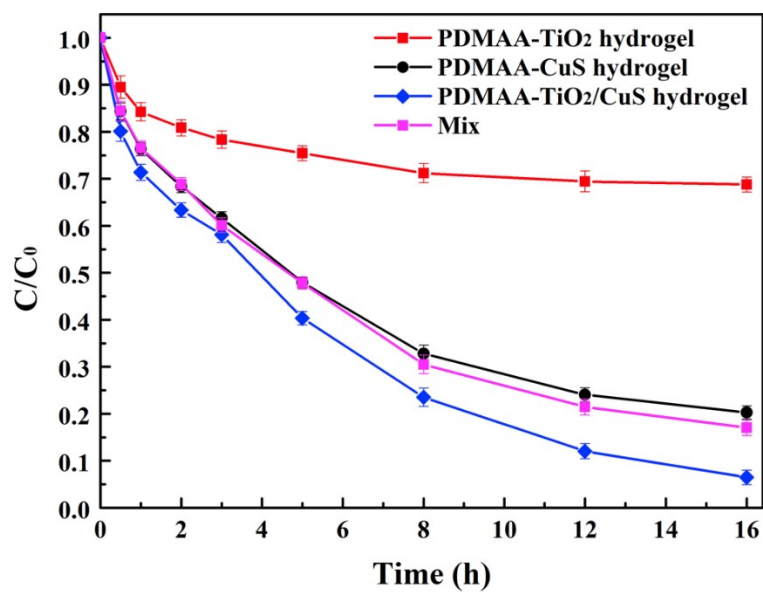

Fig. S13. The photodegradation rate of sulfaclozine using PDMAA-TiO<sub>2</sub>, PDMAA-CuS, PDMAA-TiO<sub>2</sub>/CuS hydrogel, and mix (PDMAA-CuS hydrogel and TiO<sub>2</sub> nanoparticles) with 300W visible light.

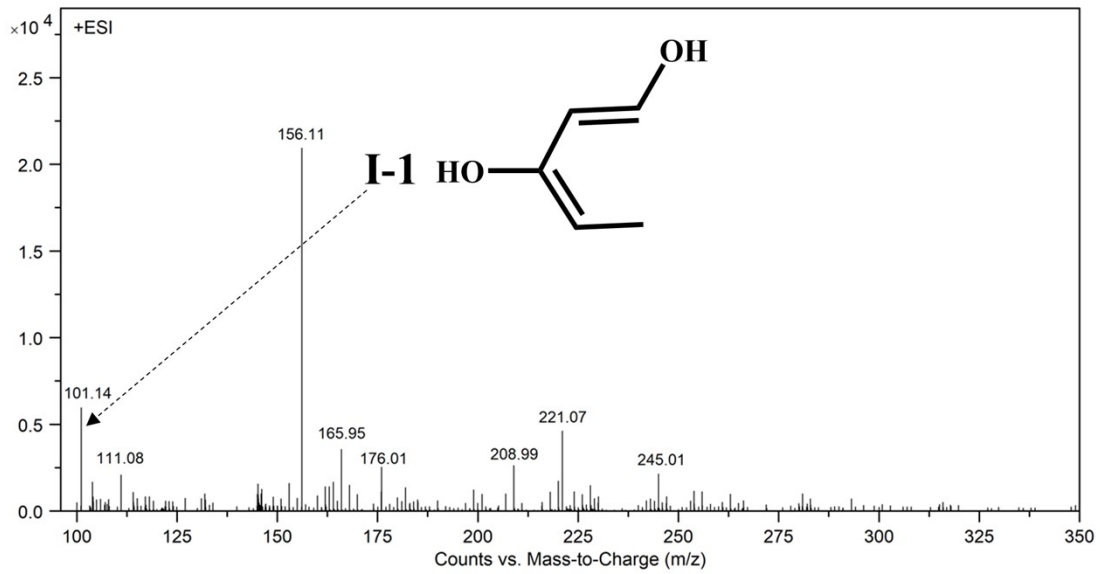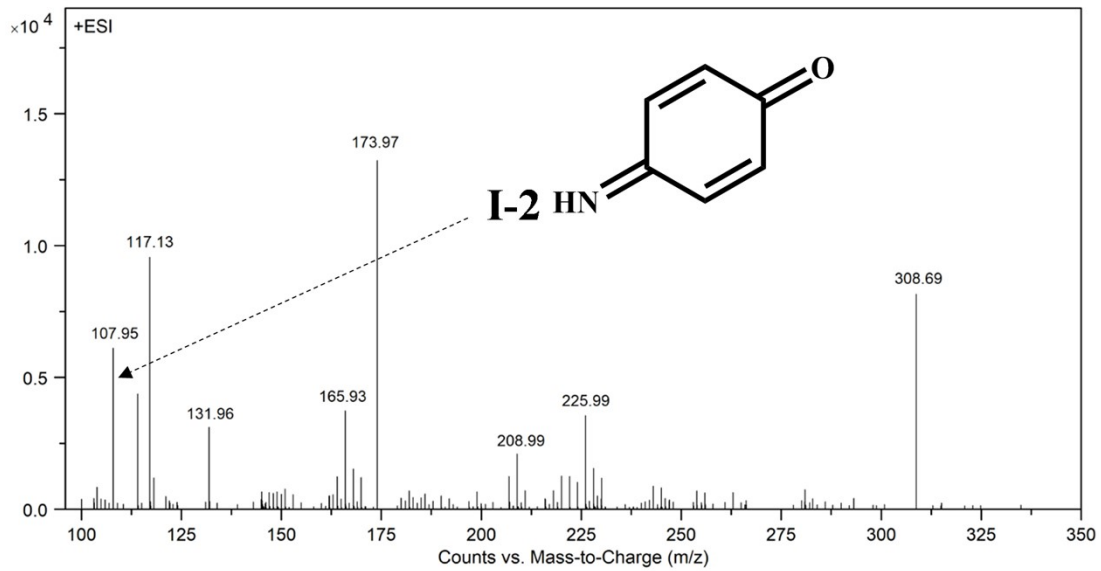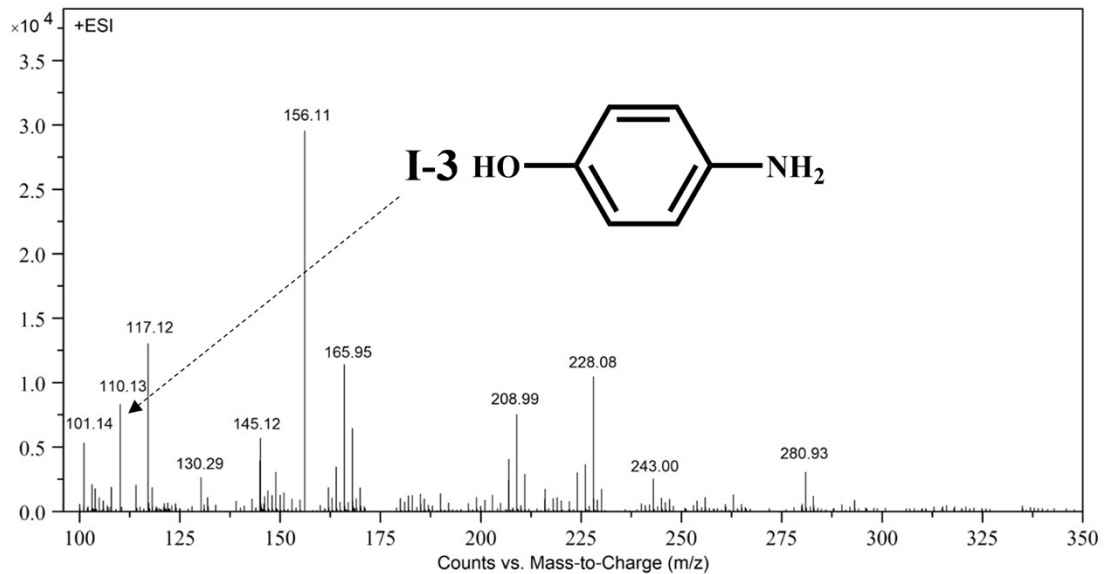

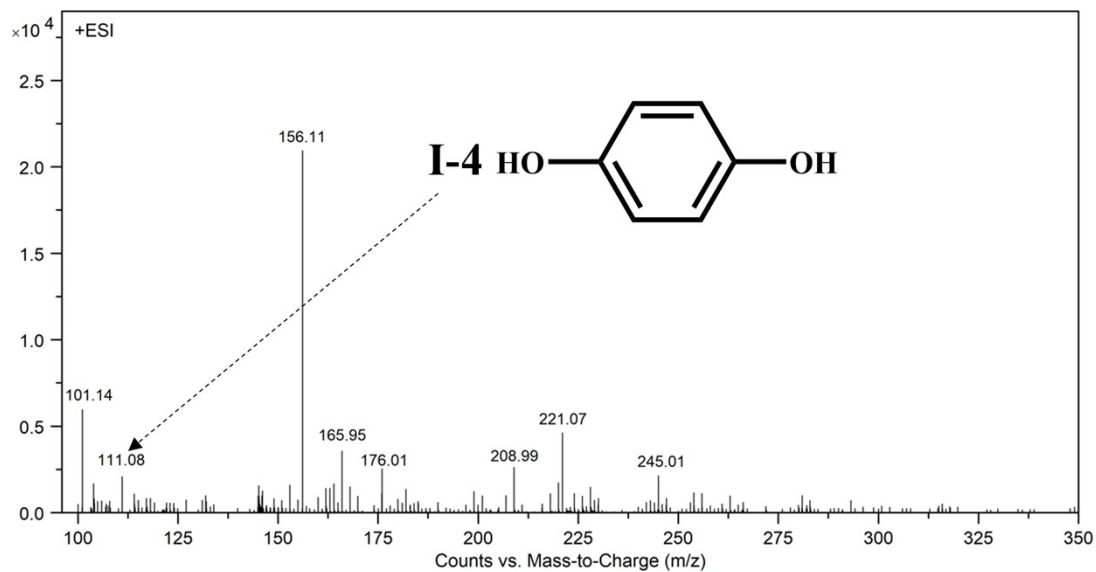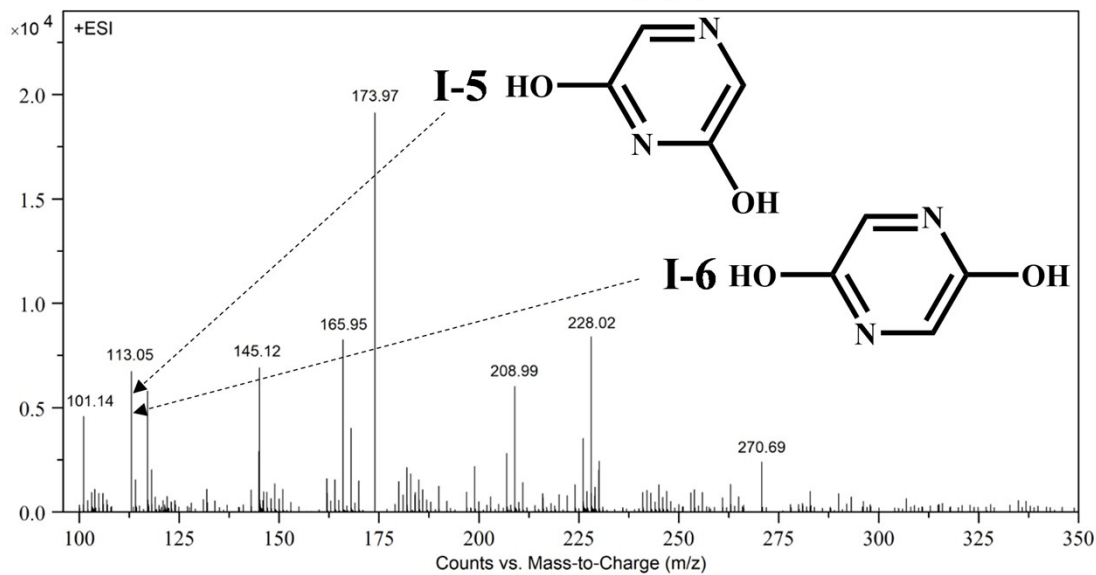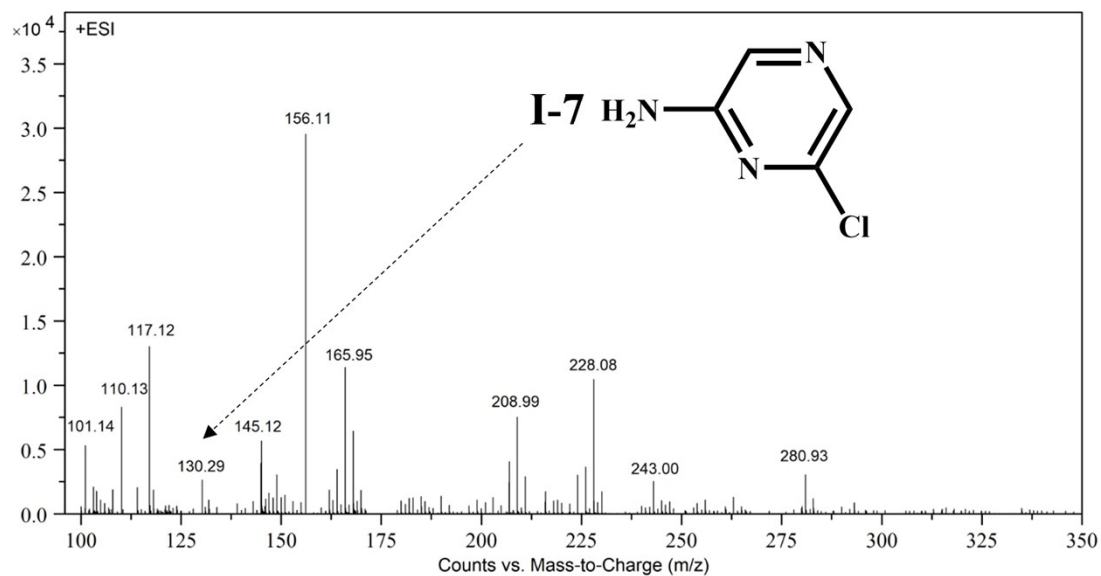

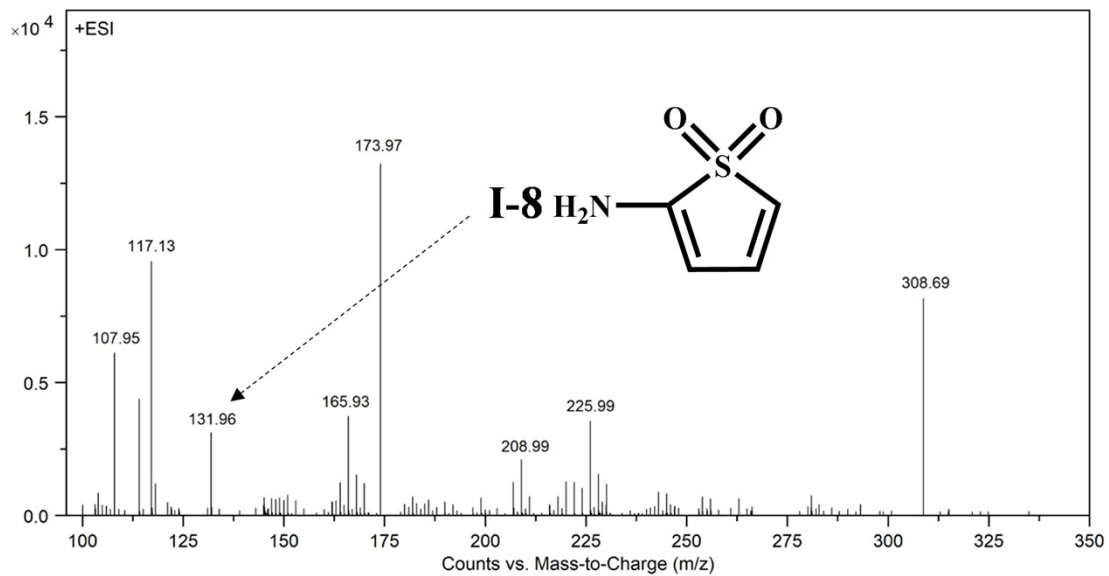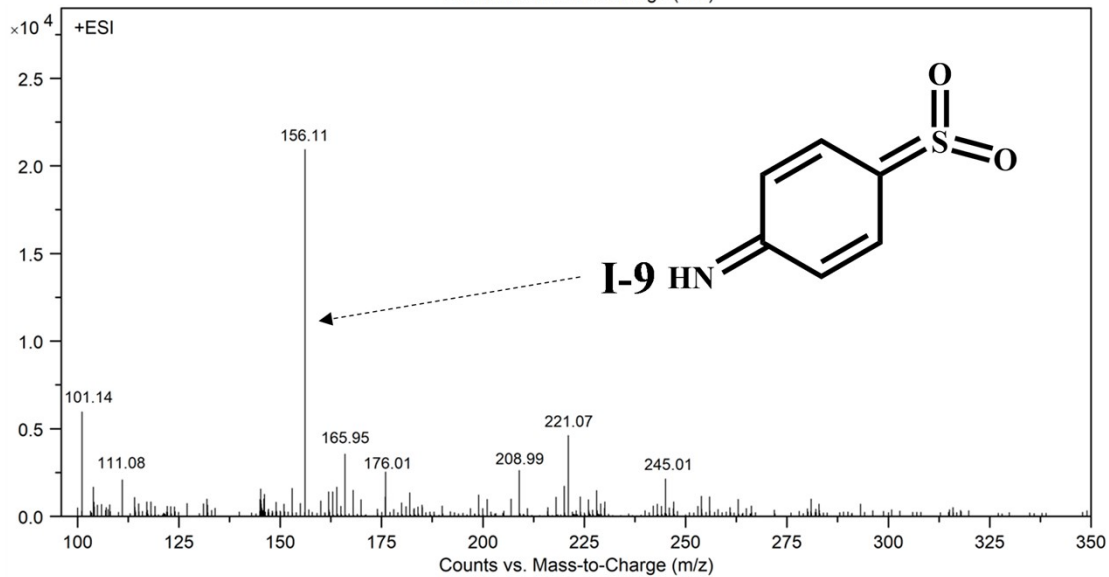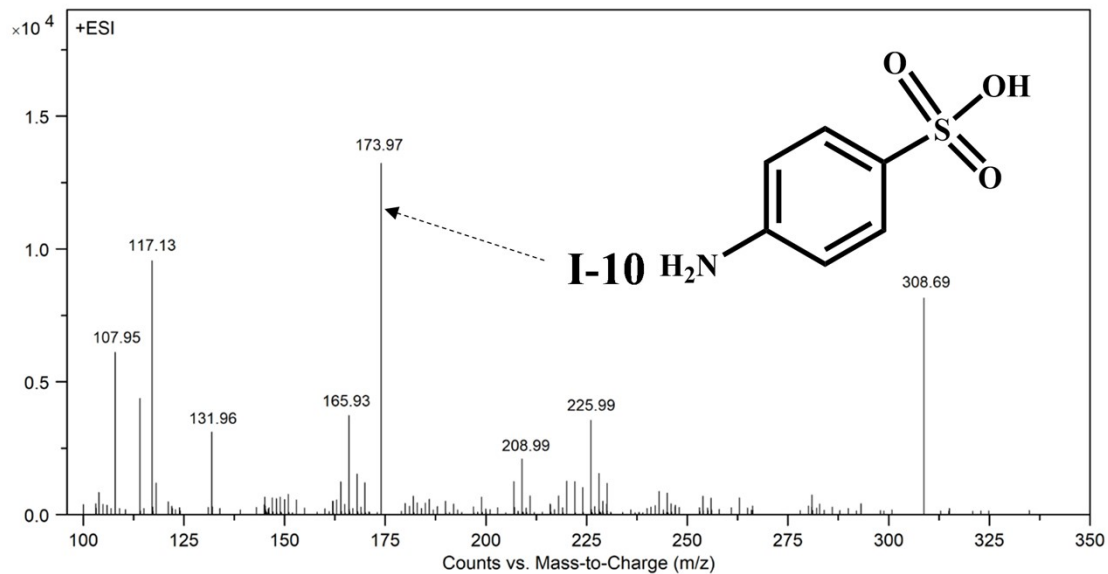



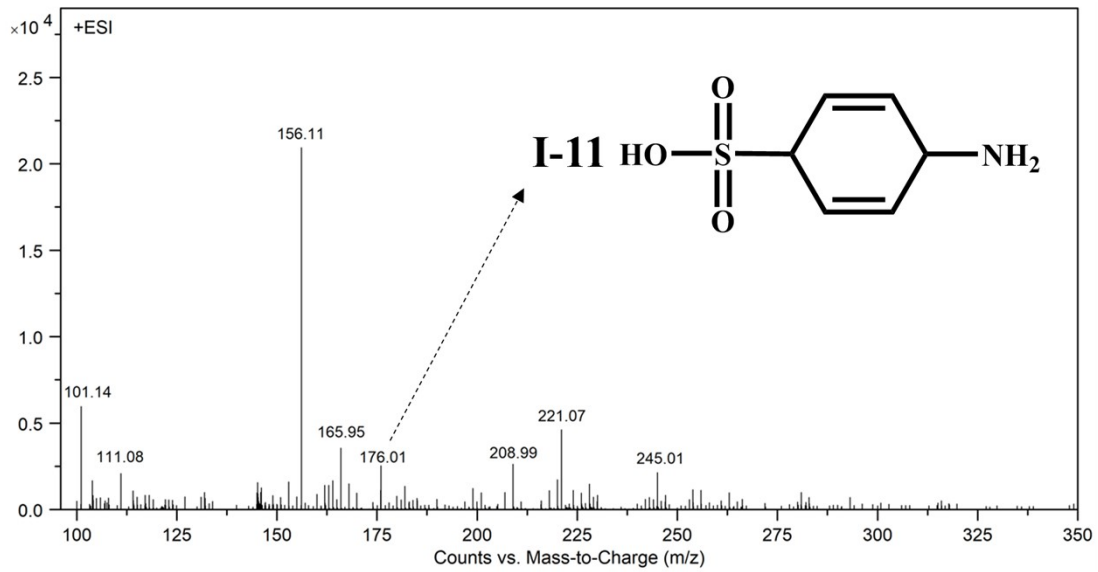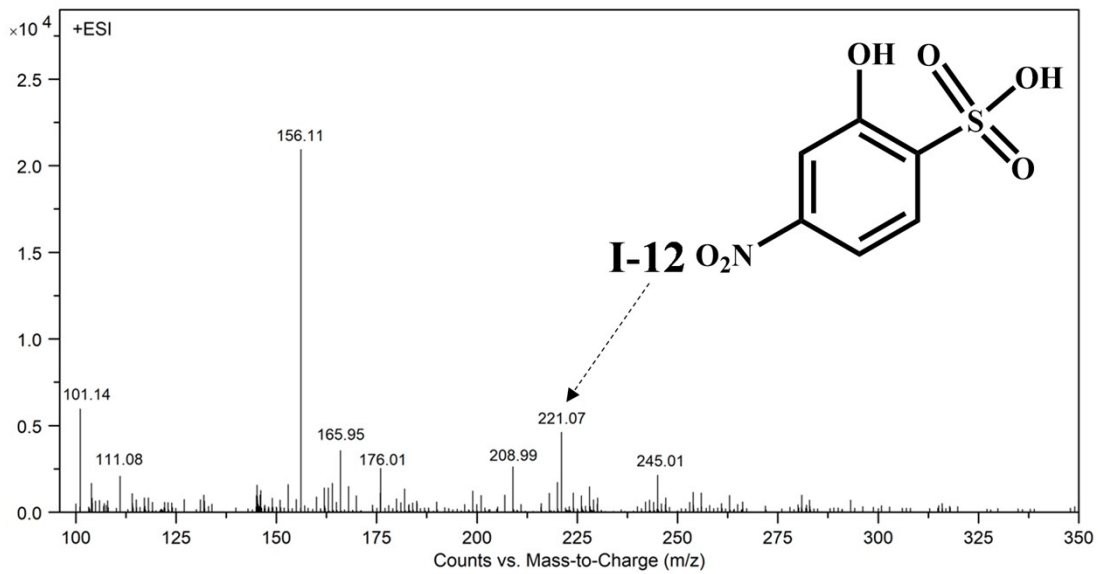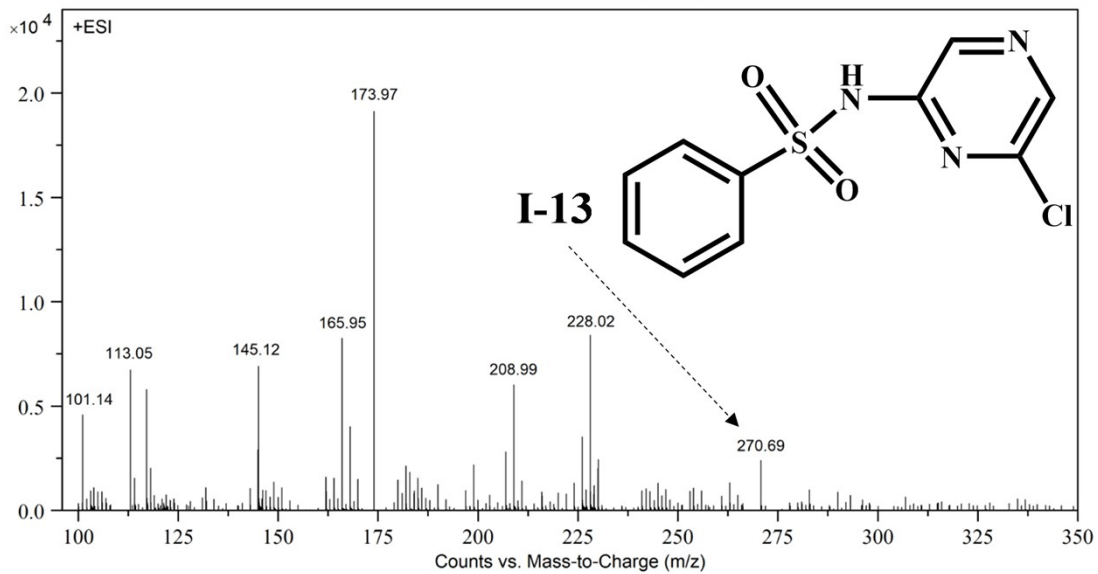

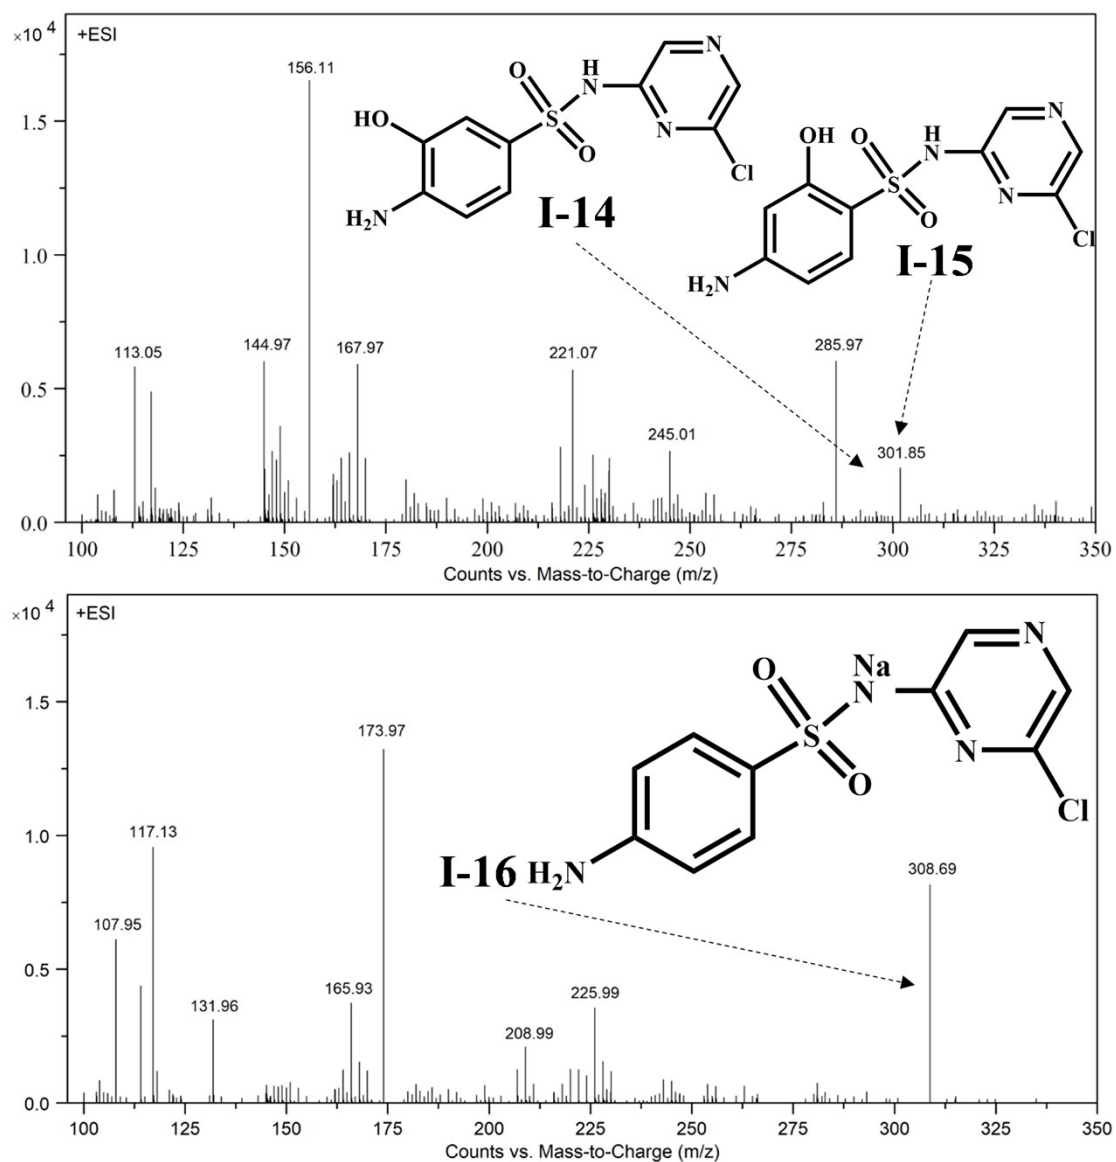

Fig. 14. The MS data and proposed structures of the intermediates of sulfaclozine photodegradation in the composite hydrogel catalysis system.

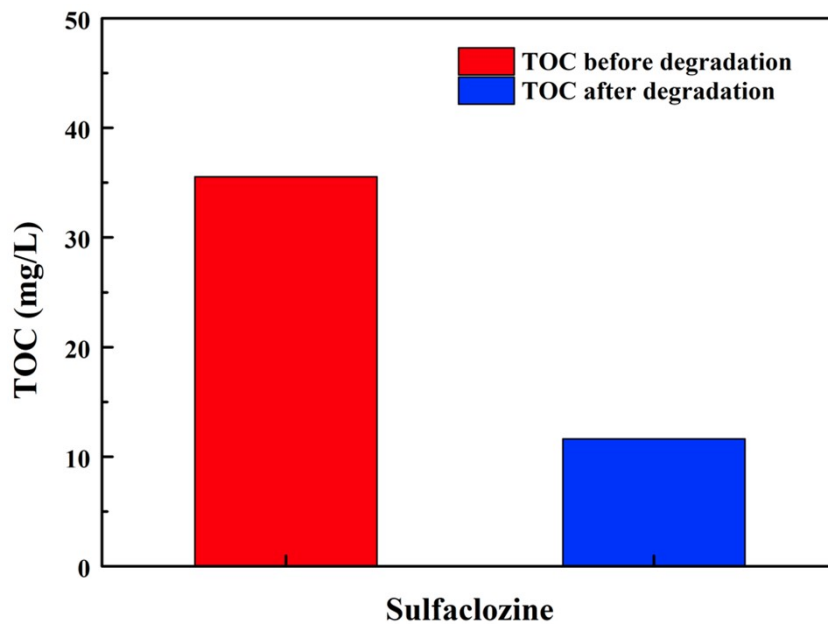

Fig. S15. The TOC removal ratio of sulfaclozine in the composite hydrogel catalysis system.

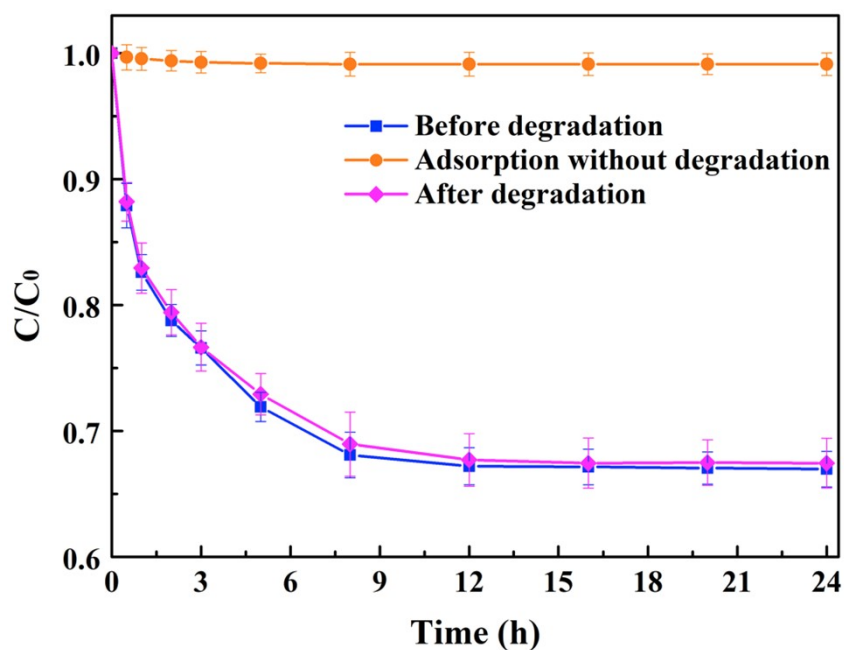

Fig. S16. The curves of the removal rate for sulfaclozine using PDMAA-TiO<sub>2</sub>/CuS hydrogels at various circumstances including adsorption before degradation, adsorption again after degradation, and repeating adsorption without degradation.

Table S1. The photodegradation intermediates of sulfaclozine

| Product ID | Possible intermediates and structure                                                | [M+H] <sup>+</sup> | Reported by |
|------------|-------------------------------------------------------------------------------------|--------------------|-------------|
| I-1        | 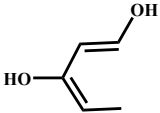   | 101.14             | [3]         |
| I-2        |    | 107.95             | [4]         |
| I-3        |    | 110.13             | [2]         |
| I-4        |   | 111.08             | [5]         |
| I-5        |  | 113.05             | [5]         |
| I-6        |  | 113.05             | [5]         |
| I-7        |  | 130.29             | [6]         |
| I-8        |  | 131.96             | [5]         |
| I-9        |  | 156.11             | [7]         |

| Product ID | Possible intermediates and structure                                                | [M+H] <sup>+</sup> | Reported by |
|------------|-------------------------------------------------------------------------------------|--------------------|-------------|
| I-10       | 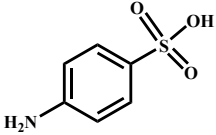   | 173.97             | [8]         |
| I-11       |    | 176.01             | [9]         |
| I-12       |    | 221.07             | [3]         |
| I-13       |    | 270.69             | [2]         |
| I-14       |  | 301.85             | [10]        |
| I-15       |  | 301.85             | [11]        |
| I-16       |  | 308.69             | [12]        |

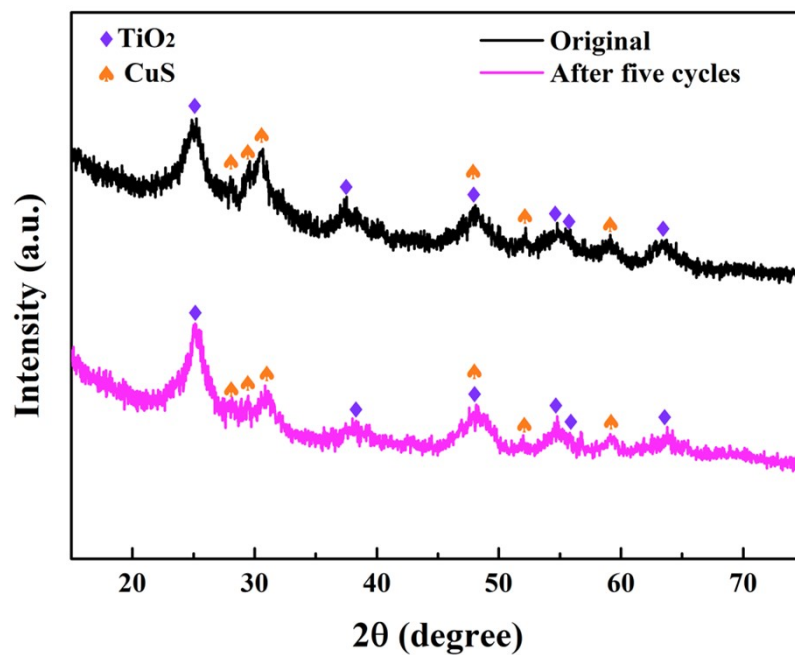

Fig. S17. XRD spectra of PDMAA-TiO<sub>2</sub>/CuS hydrogel before and after the cycling test.

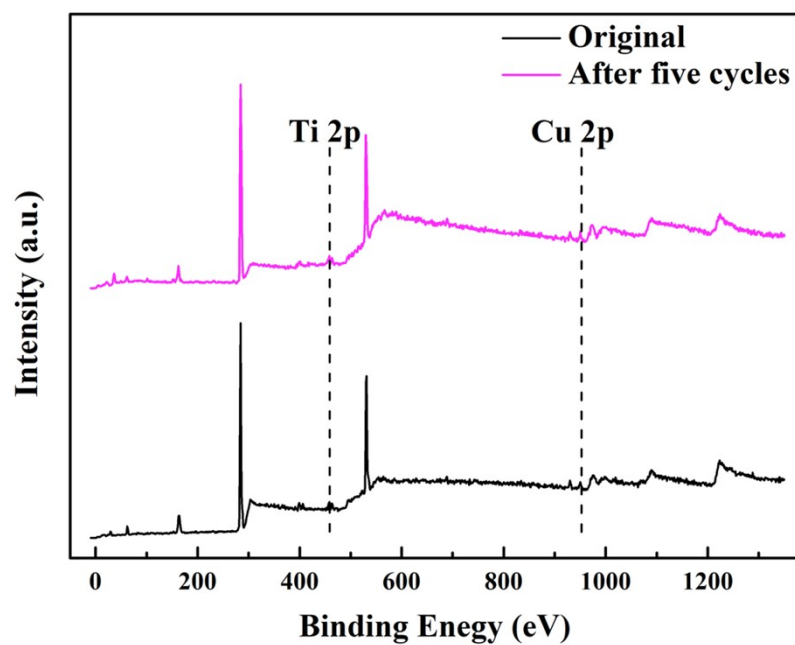

Fig. S18. XPS spectra of PDMAA-TiO<sub>2</sub>/CuS hydrogel before and after the cycling test.

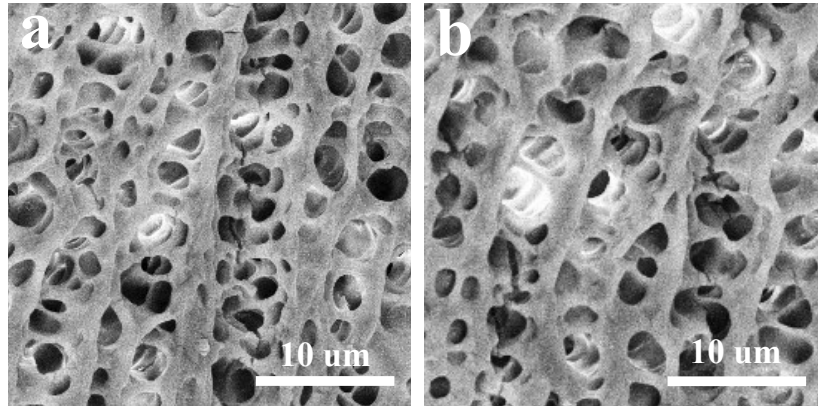

Fig. S19. The SEM images of PDMAA-TiO<sub>2</sub>/CuS hydrogel (a) before and (b) after the cycling test.

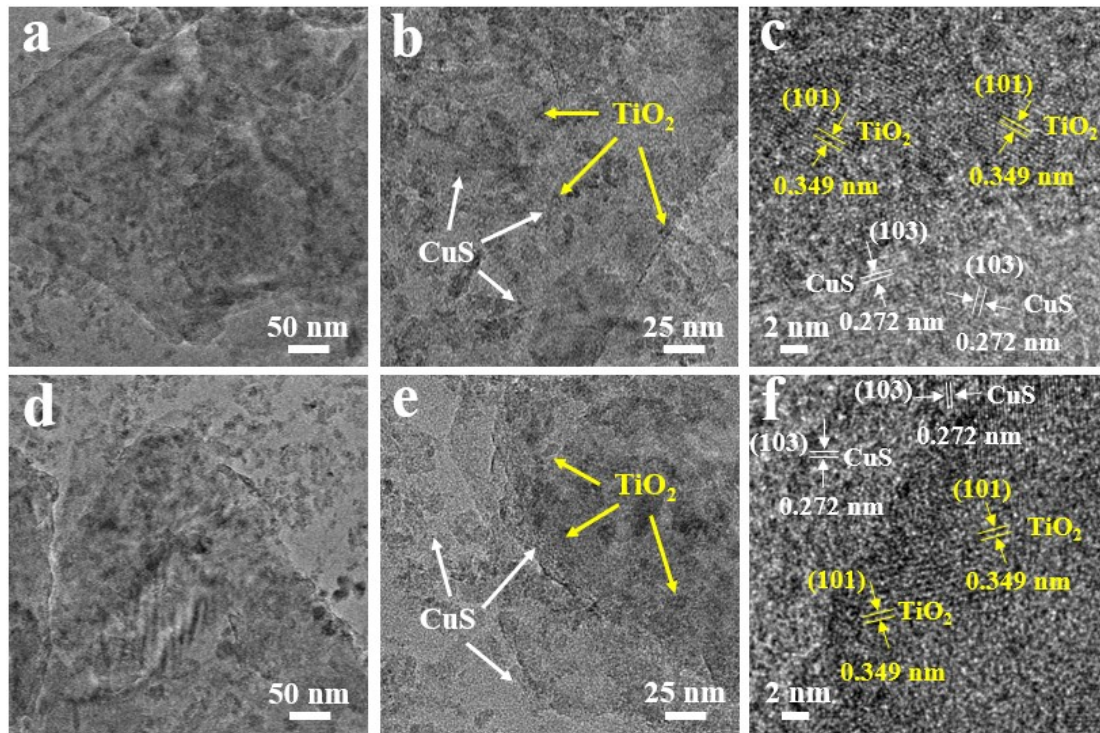

Fig. S20. The TEM images of PDMAA-TiO<sub>2</sub>/CuS hydrogel (a,b,c) before and (d, e, f) after the cycling test.

Table S2. Property comparison of photocatalysts reported in recent three years for degradation of antibiotics under visible light irradiation.

|    | Photocatalyst                                                                                        | Target contaminant | Separation free | Adsorption | Optimum photodegradation | Mineralization | Reusability | Year | Ref. |
|----|------------------------------------------------------------------------------------------------------|--------------------|-----------------|------------|--------------------------|----------------|-------------|------|------|
| 1  | MoS <sub>2</sub> /graphene aerogel                                                                   | Tetracycline       | Yes             | -          | 10.00%                   | -              | Yes         | 2019 | [13] |
| 2  | Bi <sub>2</sub> O <sub>3</sub> /Bi <sub>2</sub> MoO <sub>6</sub>                                     | Tetracycline       | N/A             | -          | 70.00%                   | -              | Yes         | 2019 | [14] |
| 3  | In <sub>2</sub> S <sub>3</sub> /InVO <sub>4</sub>                                                    | Tetracycline       | N/A             | -          | 71.41%                   | 61.14%         | Yes         | 2019 | [15] |
| 4  | W-doped BaTiO <sub>3</sub>                                                                           | Tetracycline       | N/A             | 15.00%     | 80.00%                   | -              | Yes         | 2019 | [16] |
| 5  | TCPP/rGO/Bi <sub>2</sub> WO <sub>6</sub>                                                             | Tetracycline       | N/A             | -          | 84.00%                   | -              | Yes         | 2019 | [17] |
| 6  | Ce <sup>3+</sup> doped Bi <sub>2</sub> O <sub>3</sub>                                                | Tetracycline       | N/A             | -          | 89.10%                   | -              | N/A         | 2019 | [18] |
| 7  | Ti <sup>3+</sup> /N co-doped TiO <sub>2</sub> /DG                                                    | Tetracycline       | N/A             | -          | 92.00%                   | -              | N/A         | 2019 | [19] |
| 8  | BiOCl/TiO <sub>2</sub> composite                                                                     | Tetracycline       | N/A             | 28.27%     | 84.04%                   | -              | Yes         | 2020 | [20] |
| 9  | MoS <sub>2</sub> /g-C <sub>3</sub> N <sub>4</sub> /Bi <sub>24</sub> O <sub>31</sub> Cl <sub>10</sub> | Tetracycline       | N/A             | -          | 97.50%                   | -              | Yes         | 2020 | [21] |
| 10 | Z-scheme Bi <sub>2</sub> WO <sub>6</sub> -P25                                                        | Tetracycline       | N/A             | -          | 89.00%                   | 51.00%         | Yes         | 2021 | [22] |
| 11 | CoP/ZnSnO <sub>3</sub>                                                                               | Tetracycline       | N/A             | -          | 96.44%                   | -              | N/A         | 2021 | [23] |
| 12 | Pt/BiVO <sub>4</sub> Nanosheets                                                                      | Tetracycline       | N/A             | -          | 88.50%                   | -              | N/A         | 2021 | [24] |
| 13 | Cu <sub>2</sub> O nanostructures                                                                     | Trimethoprim       | N/A             | -          | 77.29%                   | -              | N/A         | 2021 | [25] |
| 14 | Bi (Spheres)/g-C <sub>3</sub> N <sub>4</sub>                                                         | Amoxicillin        | N/A             | -          | 5.00%                    | -              | N/A         | 2019 | [26] |



| Photocatalyst                                                               | Target contaminant | Separation free | Adsorption | Optimum photodegradation | Mineralization | Reusability | Year | Ref. |
|-----------------------------------------------------------------------------|--------------------|-----------------|------------|--------------------------|----------------|-------------|------|------|
| 15 Pt-Bi co-doped TiO <sub>2</sub>                                          | Amoxicillin        | N/A             | -          | 87.67%                   | -              | N/A         | 2019 | [27] |
| 16 Mesoporous g-C <sub>3</sub> N <sub>4</sub>                               | Amoxicillin        | N/A             | -          | 90.00%                   | 25.00%         | Yes         | 2020 | [28] |
| 17 Cu doped TiO <sub>2</sub>                                                | Amoxicillin        | N/A             | -          | 90.00%                   | -              | N/A         | 2020 | [29] |
| 18 CuI/FePO <sub>4</sub>                                                    | Amoxicillin        | N/A             | -          | 90.00%                   | -              | Yes         | 2022 | [30] |
| 19 TiO <sub>2</sub> /Bi <sub>2</sub> MoO <sub>6</sub>                       | Amoxicillin        | N/A             | -          | 94.10%                   | 65.40%         | Yes         | 2022 | [31] |
| 20 Fe <sub>3</sub> O <sub>4</sub> @SiO <sub>2</sub> @MIL-53-NH <sub>2</sub> | Ampicillin         | N/A             | -          | 70.00%                   | -              | Yes         | 2020 | [32] |
| 21 C <sub>3</sub> N <sub>4</sub> -MoS <sub>2</sub> /3DG                     | Ampicillin         | N/A             | -          | 74.60%                   | 26.87%         | N/A         | 2021 | [33] |
| 22 Bi/Bi <sub>3</sub> NbO <sub>7</sub> nanosheets                           | Ciprofloxacin      | N/A             | -          | 86.00%                   | 53.00%         | N/A         | 2019 | [34] |
| 23 Polyaniline/Bi <sub>4</sub> O <sub>5</sub> Br <sub>2</sub>               | Ciprofloxacin      | N/A             | 23.03%     | 99.00%                   | -              | Yes         | 2019 | [35] |
| 24 Fe <sub>3</sub> O <sub>4</sub> /CdS/g-C <sub>3</sub> N <sub>4</sub>      | Ciprofloxacin      | N/A             | -          | 81.00%                   | -              | N/A         | 2020 | [36] |
| 25 N-doped TiO <sub>2</sub> nanoparticles                                   | Ciprofloxacin      | N/A             | -          | 54.50%                   | 26.00%         | N/A         | 2020 | [37] |
| 26 Ag-TiO <sub>2</sub>                                                      | Ciprofloxacin      | N/A             | -          | 92.00%                   | -              | Yes         | 2021 | [38] |
| 27 Bi <sub>2</sub> O <sub>3</sub> -modified La-NaTaO <sub>3</sub>           | Ciprofloxacin      | N/A             | -          | 83.00%                   | -              | Yes         | 2021 | [39] |
| 28 g-C <sub>3</sub> N <sub>4</sub> /Zn doped Fe <sub>3</sub> O <sub>4</sub> | Cephalexin         | N/A             | -          | 91.00%                   | 80.50%         | Yes         | 2019 | [40] |
| 29 Urea/TiO <sub>2</sub> /ZnFe <sub>2</sub> O <sub>4</sub> /zeolite         | Cephalexin         | N/A             | -          | 95.00%                   | -              | Yes         | 2020 | [41] |

| Photocatalyst                                                                     | Target contaminant | Separation free | Adsorption | Optimum photodegradation | Mineralization | Reusability | Year      | Ref. |
|-----------------------------------------------------------------------------------|--------------------|-----------------|------------|--------------------------|----------------|-------------|-----------|------|
| 30 CuWO <sub>4</sub> /Bi <sub>2</sub> S <sub>3</sub> /ZIF67                       | Cephalexin         | N/A             | -          | 90.10%                   | 74.00%         | Yes         | 2020      | [42] |
| 31 z-scheme MoO <sub>3</sub> /Ag/C <sub>3</sub> N <sub>4</sub>                    | Ofloxacin          | N/A             | 33.00%     | 96.00%                   | 60.00%         | Yes         | 2020      | [43] |
| 32 N-TiO <sub>2</sub> coupled BiVO <sub>4</sub>                                   | Ofloxacin          | N/A             | -          | 92.00%                   | 78.00%         | Yes         | 2021      | [44] |
| 33 LaFeO <sub>3</sub> /lignin-biochar                                             | Ofloxacin          | N/A             | 26.71%     | 95.60%                   | -              | Yes         | 2022      | [45] |
| 34 Biochar-based Zn-TiO <sub>2</sub> /pBC                                         | Sulfamethoxazole   | N/A             | -          | 81.21%                   | 56.13%         | Yes         | 2019      | [46] |
| 35 Fe <sub>3</sub> O <sub>4</sub> modified BiOCl/BiVO <sub>4</sub>                | Sulfamethoxazole   | N/A             | -          | 91.00%                   | -              | N/A         | 2019      | [47] |
| 36 MnO <sub>2</sub> incorporating Fe <sub>2</sub> O <sub>3</sub>                  | Sulfamethoxazole   | N/A             | -          | 90.00%                   | -              | Yes         | 2020      | [3]  |
| 37 α-Fe <sub>2</sub> O <sub>3</sub> @graphene                                     | Sulfamethoxazole   | N/A             | -          | 92.00%                   | -              | N/A         | 2020      | [48] |
| 38 Silicate glass@Cu <sub>2</sub> O/Cu <sub>2</sub> V <sub>2</sub> O <sub>7</sub> | Sulfamethoxazole   | N/A             | -          | 90.10%                   | 83.20%         | Yes         | 2021      | [49] |
| 39 Ag <sub>2</sub> O-KNbO <sub>3</sub>                                            | Sulfamethoxazole   | N/A             | -          | 92.00%                   | -              | N/A         | 2021      | [50] |
| 40 PDMAA-TiO <sub>2</sub> /CuS hydrogel                                           | Sulfaclozine       | Yes             | 32.96%     | 97.86%                   | 67.53%         | Yes         | This work |      |

## References

- [1] R. Tamaki, K. Naka, T. Chujo, Synthesis of poly(N,N'-dimethylacrythlamide)/silica gel polymer hybrids by in situ polymerization method, *Ploym. J.*, 30 (1998) 60-65.
- [2] J. H. Yang, Z. K. Li, H. J. Zhu, Adsorption and photocatalytic degradation of sulfamethoxazole by a novel composite hydrogel with visible light irradiation, *Appl. Catal. B*, 217 (2017) 603-614.
- [3] R. Guo, Y. Wang, J. Li, X. Cheng, D.D. Dionysiou, Sulfamethoxazole degradation by visible light assisted peroxymonosulfate process based on nanohybrid manganese dioxide incorporating ferric oxide, *Appl. Catal. B*, 278 (2020) 119297.
- [4] M. Jahdi, S.B. Mishra, E.N. Nxumalo, S.D. Mhlanga, A.K. Mishra, Smart pathways for the photocatalytic degradation of sulfamethoxazole drug using F-Pd co-doped TiO<sub>2</sub> nanocomposites, *Appl. Catal. B*, 267 (2020) 118716.
- [5] L. Ismail, A. Rifai, C. Ferronato, L. Fine, F. Jaber, J. Chovelon, Towards a better understanding of the reactive species involved in the photocatalytic degradation of sulfaclozine, *Appl. Catal. B*, 185 (2016) 88-99.
- [6] P. Calza, Photocatalytic transformations of sulphonamides on titanium dioxide, *Appl. Catal. B*, 53 (2004) 63-69.
- [7] G. Liu, X. Li, B. Han, L. Chen, L. Zhu, L.C. Campos, Efficient degradation of sulfamethoxazole by the Fe(II)/HSO<sub>5</sub><sup>-</sup> process enhanced by hydroxylamine: Efficiency and mechanism, *J. Hazard. Mater.*, 322 (2017) 461-468.
- [8] A. Fabianska, A. Bialk-Bielinska, P. Stepnowski, S. Stolte, E.M. Siedlecka, Electrochemical degradation of sulfonamides at BDD electrode: kinetics, reaction pathway and eco-toxicity evaluation, *J. Hazard. Mater.*, 280 (2014) 579-587.
- [9] H. Gong, W. Chu, Determination and toxicity evaluation of the generated products in sulfamethoxazole degradation by UV/CoFe<sub>2</sub>O<sub>4</sub>/TiO<sub>2</sub>, *J. Hazard. Mater.*, 314 (2016) 197-203.
- [10] K. Li, P. Zhang, L. Ge, H. Ren, C. Yu, X. Chen, Y. Zhao, Concentration-dependent photodegradation kinetics and hydroxyl-radical oxidation of phenicol antibiotics, *Chemosphere*, 111 (2014) 278-282.
- [11] A. Dirany, I. Sires, N. Oturan, A. Ozcan, M.A. Oturan, Electrochemical treatment of the antibiotic sulfachloropyridazine: kinetics, reaction pathways, and toxicity evolution, *Environ. Sci. Technol.*, 46 (2012) 4074-4082.
- [12] L. Ismail, C. Ferronato, L. Fine, F. Jaber, J. Chovelon, Elimination of sulfaclozine from water with SO<sub>4</sub><sup>-</sup> radicals: Evaluation of different persulfate activation methods, *Appl. Catal. B*, 201 (2017) 573-581.
- [13] X. Yang, Z. Chen, J. Fang, Q. Yang, W. Zhao, X. Qian, D. Zhou, C. Liu, M. Chen, Freestanding 3D MoS<sub>2</sub> nanosheets/graphene aerogel heterostructure as a recyclable photocatalyst for efficiently degrading antibiotic residues, *Mater. Lett.*, 252 (2019) 5-7.
- [14] H. Zhen, M.A. Khan, M. Xia, W. Lei, F. Wang, Controllable synthesis of flower-root shaped Bi<sub>2</sub>O<sub>3</sub>/Bi<sub>2</sub>MoO<sub>6</sub> heterostructures as an efficient photocatalyst under visible light irradiation, *J. Photochem. Photobiol., A*, 372 (2019) 78-88.

- [15] X. Yuan, L. Jiang, J. Liang, Y. Pan, J. Zhang, H. Wang, L. Leng, Z. Wu, R. Guan, G. Zeng, In-situ synthesis of 3D microsphere-like  $\text{In}_2\text{S}_3/\text{InVO}_4$  heterojunction with efficient photocatalytic activity for tetracycline degradation under visible light irradiation, *Chem. Eng. J.*, 356 (2019) 371-381.
- [16] P. Demircivi, E.B. Simsek, Visible-light-enhanced photoactivity of perovskite-type W-doped  $\text{BaTiO}_3$  photocatalyst for photodegradation of tetracycline, *J. Alloy. Compd.*, 774 (2019) 795-802.
- [17] K. Hu, C. Chen, Y. Zhu, G. Zeng, B. Huang, W. Chen, S. Liu, C. Lei, B. Li, Y. Yang, Ternary Z-scheme heterojunction of  $\text{Bi}_2\text{WO}_6$  with reduced graphene oxide (rGO) and meso-tetra (4-carboxyphenyl) porphyrin (TCPP) for enhanced visible-light photocatalysis, *J. Colloid. Interface Sci.*, 540 (2019) 115-125.
- [18] W. Zhang, S. Gao, D. Chen, Preparation of  $\text{Ce}^{3+}$  doped  $\text{Bi}_2\text{O}_3$  hollow needle-shape with enhanced visible-light photocatalytic activity, *J. Rare Earths*, 37 (2019) 726-731.
- [19] Y. Chen, Q. Wu, L. Liu, J. Wang, Y. Song, The fabrication of self-floating  $\text{Ti}^{3+}/\text{N}$  co-doped  $\text{TiO}_2$ /diatomite granule catalyst with enhanced photocatalytic performance under visible light irradiation, *Appl. Surf. Sci.*, 467-468 (2019) 514-525.
- [20] S. Bao, H. Liang, C. Li, J. Bai, A heterostructure  $\text{BiOCl}$  nanosheets/ $\text{TiO}_2$  hollow-tubes composite for visible light-driven efficient photodegradation antibiotic, *J. Photochem. Photobiol., A*, 397 (2020) 112590.
- [21] J. Kang, C. Jin, Z. Li, M. Wang, Z. Chen, Y. Wang, Dual Z-scheme  $\text{MoS}_2/\text{g-C}_3\text{N}_4/\text{Bi}_2\text{WO}_6$  ternary heterojunction photocatalysts for enhanced visible-light photodegradation of antibiotic, *J. Alloy. Compd.*, 825 (2020) 153975.
- [22] J. Tian, L. Wei, Z. Ren, J. Lu, J. Ma, The facile fabrication of Z-scheme  $\text{Bi}_2\text{WO}_6$ -P25 heterojunction with enhanced photodegradation of antibiotics under visible light, *J. Environ. Chem. Eng.*, 9 (2021) 106167.
- [23] Z. Chen, X. Chu, X. Huang, H. Sun, L. Chen, F. Guo, Fabrication of visible-light driven  $\text{CoP}/\text{ZnSnO}_3$  composite photocatalyst for high-efficient photodegradation of antibiotic pollutant, *Sep. Purif. Technol.*, 257 (2021) 117900.
- [24] J.T. Wang, Y.L. Cai, X.J. Liu, X.D. Zhang, F.Y. Cai, H.L. Cao, Z. Zhong, Y.F. Li, L. Lü, Unveiling the visible-light-driven photodegradation pathway and products toxicity of tetracycline in the system of  $\text{Pt}/\text{BiVO}_4$  nanosheets, *J. Hazard. Mater.*, 424 (2021) 127596.
- [25] K. Sekar, C. Chuaicham, U. Balijapalli, W. Li, K. Wilson, A. F. Lee, K. Sasaki, Surfactant- and template-free hydrothermal assembly of  $\text{Cu}_2\text{O}$  visible light photocatalysts for trimethoprim degradation, *Appl. Catal. B*, 284 (2021) 119741.
- [26] Z. Wei, J. Liu, W. Fang, M. Xu, Z. Qin, Z. Jiang, W. Shangguan, Photocatalytic hydrogen evolution with simultaneous antibiotic wastewater degradation via the visible-light-responsive bismuth spheres-g- $\text{C}_3\text{N}_4$  nanohybrid: Waste to energy insight, *Chem. Eng. J.*, 358 (2019) 944-954.
- [27] M. Salimi, M. Behbahani, H.R. Sobhi, M. Gholami, A. Jonidi Jafari, R. Rezaei

- Kalantary, M. Farzadkia, A. Esrafil, A new nano-photocatalyst based on Pt and Bi co-doped TiO<sub>2</sub> for efficient visible-light photo degradation of amoxicillin, *New J. Chem.*, 43 (2019) 1562-1568.
- [28] M. Dou, J. Wang, B. Gao, C. Xu, F. Yang, Photocatalytic difference of amoxicillin and cefotaxime under visible light by mesoporous g-C<sub>3</sub>N<sub>4</sub>: Mechanism, degradation pathway and DFT calculation, *Chem. Eng. J.*, 383 (2020) 123134.
- [29] P.Y.Y. E.T. Wahyuni, N.H. Aprilita, Enhancement of visible-light photocatalytic activity of Cu-doped TiO<sub>2</sub> for photodegradation of amoxicillin in water, *J. Environ. Mater. Sci.*, 11 (2020) 670-683.
- [30] F. Beshkar, A. Al-Nayili, O. Amiri, M. Salavati-Niasari, M. Mousavi-Kamazani, Visible light-induced degradation of amoxicillin antibiotic by novel CuI/FePO<sub>4</sub> p-n heterojunction photocatalyst and photodegradation mechanism, *J. Alloy. Compd.*, 892 (2022) 162176.
- [31] Y. Wang, G. Zuo, J. Kong, Y. Guo, Z. Xian, Y. Dai, J. Wang, T. Gong, C. Sun, Q. Xian, Sheet-on-sheet TiO<sub>2</sub>/Bi<sub>2</sub>MoO<sub>6</sub> heterostructure for enhanced photocatalytic amoxicillin degradation, *J. Hazard. Mater.*, 421 (2022) 126634.
- [32] S. Sohrabnezhad, A. Pourahmad, M.F. Karimi, Magnetite-metal organic framework core@shell for degradation of ampicillin antibiotic in aqueous solution, *J. Solid State Chem.*, 288 (2020) 121420.
- [33] W. Yang, Y. Wang, Enhanced electron and mass transfer flow-through cell with C<sub>3</sub>N<sub>4</sub>-MoS<sub>2</sub> supported on three-dimensional graphene photoanode for the removal of antibiotic and antibacterial potencies in ampicillin wastewater, *Appl. Catal. B*, 282 (2021) 119574.
- [34] K. Wang, Y. Li, G. Zhang, J. Li, X. Wu, 0D Bi nanodots/2D Bi<sub>3</sub>NbO<sub>7</sub> nanosheets heterojunctions for efficient visible light photocatalytic degradation of antibiotics: Enhanced molecular oxygen activation and mechanism insight, *Appl. Catal. B*, 240 (2019) 39-49.
- [35] Y. Xu, Y. Ma, H. Ji, S. Huang, M. Xie, Y. Zhao, H. Xu, H. Li, Enhanced long-wavelength light utilization with polyaniline/bismuth-rich bismuth oxyhalide composite towards photocatalytic degradation of antibiotics, *J. Colloid. Interface Sci.*, 537 (2019) 101-111.
- [36] N. Zhang, X. Li, Y. Wang, B. Zhu, J. Yang, Fabrication of magnetically recoverable Fe<sub>3</sub>O<sub>4</sub>/CdS/g-C<sub>3</sub>N<sub>4</sub> photocatalysts for effective degradation of ciprofloxacin under visible light, *Ceram. Int.*, 46 (2020) 20974-20984.
- [37] A.V. Karim, A. Shrivastav, Degradation of ciprofloxacin using photo, sono, and sonophotocatalytic oxidation with visible light and low-frequency ultrasound: Degradation kinetics and pathways, *Chem. Eng. J.*, 392 (2020) 124853.
- [38] J. Wang, L. Svoboda, Z. Němečková, M. Sgarzi, J. Henych, N. Licciardello, G. Cuniberti, Enhanced visible-light photodegradation of fluoroquinolone-based antibiotics and E. coli growth inhibition using Ag-TiO<sub>2</sub> nanoparticles, *RSC Adv.*, 11 (2021) 13980-13991.
- [39] A.S. Basaleh, A. Shawky, Z.I. Zaki, Visible light-driven photodegradation of

- ciprofloxacin over sol-gel prepared Bi<sub>2</sub>O<sub>3</sub>-modified La-doped NaTaO<sub>3</sub> nanostructures, *Ceram. Int.*, 47 (2021) 19205-19212.
- [40] X.S. Nguyen, T.D. Pham, H.T. Vo, K.D. Ngo, Photocatalytic degradation of cephalexin by g-C<sub>3</sub>N<sub>4</sub>/Zn doped Fe<sub>3</sub>O<sub>4</sub> under visible light, *Environ. Technol.*, 42 (2021) 1292-1301.
- [41] M. Aram, M. Farhadian, A.R. Solaimany Nazar, S. Tangestaninejad, P. Eskandari, B.-H. Jeon, Metronidazole and Cephalexin degradation by using of Urea/TiO<sub>2</sub>/ZnFe<sub>2</sub>O<sub>4</sub>/Clinoptilolite catalyst under visible-light irradiation and ozone injection, *J. Mol. Liq.*, 304 (2020) 112764.
- [42] N. Askari, M. Beheshti, D. Mowla, M. Farhadian, Fabrication of CuWO<sub>4</sub>/Bi<sub>2</sub>S<sub>3</sub>/ZIF67 MOF: A novel double Z-scheme ternary heterostructure for boosting visible-light photodegradation of antibiotics, *Chemosphere*, 251 (2020) 126453.
- [43] S. Adhikari, H.H. Lee, D.-H. Kim, Efficient visible-light induced electron-transfer in z-scheme MoO<sub>3</sub>/Ag/C<sub>3</sub>N<sub>4</sub> for excellent photocatalytic removal of antibiotics of both ofloxacin and tetracycline, *Chem. Eng. J.*, 391 (2020) 123504.
- [44] S. Cipagauta-Díaz, A. Estrella-González, M. Navarrete-Magaña, R. Gómez, N doped-TiO<sub>2</sub> coupled to BiVO<sub>4</sub> with high performance in photodegradation of Ofloxacin antibiotic and Rhodamine B dye under visible light, *Catal. Today*, (2021).
- [45] X. Chen, M. Zhang, H. Qin, J. Zhou, Q. Shen, K. Wang, W. Chen, M. Liu, N. Li, Synergy effect between adsorption and heterogeneous photo-Fenton-like catalysis on LaFeO<sub>3</sub>/lignin-biochar composites for high efficiency degradation of ofloxacin under visible light, *Sep. Purif. Technol.*, 280 (2022) 119751.
- [46] X. Xie, S. Li, H. Zhang, Z. Wang, H. Huang, Promoting charge separation of biochar-based Zn-TiO<sub>2</sub>/pBC in the presence of ZnO for efficient sulfamethoxazole photodegradation under visible light irradiation, *Sci. Total Environ.*, 659 (2019) 529-539.
- [47] R. Jiang, D. Wu, G. Lu, Z. Yan, J. Liu, R. Zhou, M. Nkoom, Fabrication of Fe<sub>3</sub>O<sub>4</sub> quantum dots modified BiOCl/BiVO<sub>4</sub> p-n heterojunction to enhance photocatalytic activity for removing broad-spectrum antibiotics under visible light, *J. Taiwan Inst. Chem. Eng.*, 96 (2019) 681-690.
- [48] K. Arora, S. Karthikeyan, B.A. Shiekh, M. Kaur, H. Singh, G.R. Bhadu, T.S. Kang, In situ preparation of a nanocomposite comprising graphene and α-Fe<sub>2</sub>O<sub>3</sub> nanospindles for the photo-degradation of antibiotics under visible light, *New J. Chem.*, 44 (2020) 15567-15573.
- [49] A. Kumar, S.K. Sharma, G. Sharma, C. Guo, D.N. Vo, J. Iqbal, M. Naushad, F.J. Stadler, Silicate glass matrix@Cu<sub>2</sub>O/Cu<sub>2</sub>V<sub>2</sub>O<sub>7</sub> p-n heterojunction for enhanced visible light photo-degradation of sulfamethoxazole: High charge separation and interfacial transfer, *J. Hazard. Mater.*, 402 (2021) 123790.
- [50] C. Liu, J. Xu, X. Du, Q. Li, Y. Fu, M. Chen, Synthesis of Ag<sub>2</sub>O-KNbO<sub>3</sub> heterojunction photocatalysts with enhanced visible-light-responsive

photocatalytic performance for sulfamethoxazole degradation, *Opt. Mater.*, 112 (2021) 110742.
